# Supplementary material
Source: publisher figshare collection journal article supplement (https://plos.figshare.com/articles/dataset/_/7265918)
Supplement: Supplementary file [file 1]

STROBE Statement—Checklist of items that should be included in reports of *cohort studies*

|                              | Item No | Recommendation                                                                                                                                                                                                                                                                                                                                                                                                                        |
|------------------------------|---------|---------------------------------------------------------------------------------------------------------------------------------------------------------------------------------------------------------------------------------------------------------------------------------------------------------------------------------------------------------------------------------------------------------------------------------------|
| <b>Title and abstract</b>    | 1       | <p>(a) Indicate the study's design with a commonly used term in the title or the abstract</p> <hr/> <p><b>Title page</b></p> <p>(b) Provide in the abstract an informative and balanced summary of what was done and what was found</p> <hr/> <p><b>Abstract</b></p>                                                                                                                                                                  |
| <b>Introduction</b>          |         |                                                                                                                                                                                                                                                                                                                                                                                                                                       |
| Background/rationale         | 2       | <p>Explain the scientific background and rationale for the investigation being reported</p> <hr/> <p><b>Introduction section, 3<sup>rd</sup> paragraph.</b></p>                                                                                                                                                                                                                                                                       |
| Objectives                   | 3       | <p>State specific objectives, including any pre-specified hypotheses</p> <hr/> <p><b>Introduction section, 5<sup>th</sup> paragraph.</b></p>                                                                                                                                                                                                                                                                                          |
| <b>Methods</b>               |         |                                                                                                                                                                                                                                                                                                                                                                                                                                       |
| Study design                 | 4       | <p>Present key elements of study design early in the paper</p> <hr/> <p><b>Methods section, study design sub-section.</b></p>                                                                                                                                                                                                                                                                                                         |
| Setting                      | 5       | <p>Describe the setting, locations, and relevant dates, including periods of recruitment, exposure, follow-up, and data collection</p> <hr/> <p><b>Methods section, study design and study components and participants sub-sections.</b></p>                                                                                                                                                                                          |
| Participants                 | 6       | <p>(a) Give the eligibility criteria, and the sources and methods of selection of participants. Describe methods of follow-up</p> <hr/> <p><b>Methods section, study components and participants sub-section.</b></p> <p>(b) For matched studies, give matching criteria and number of exposed and unexposed</p> <hr/> <p><b>Methods section, study design sub-section.</b></p>                                                       |
| Variables                    | 7       | <p>Clearly define all outcomes, exposures, predictors, potential confounders, and effect modifiers. Give diagnostic criteria, if applicable</p> <hr/> <p><b>Methods section, data collection and data handling sub-section.</b></p>                                                                                                                                                                                                   |
| Data sources/<br>measurement | 8*      | <p>For each variable of interest, give sources of data and details of methods of assessment (measurement). Describe comparability of assessment methods if there is more than one group</p> <hr/> <p><b>Methods section, data collection and data handling and primary and secondary outcomes sub-sections.</b></p>                                                                                                                   |
| Bias                         | 9       | <p>Describe any efforts to address potential sources of bias</p> <hr/> <p><b>Methods section, study design sub-section, second paragraph, and data collection and data handling section, 3<sup>rd</sup> paragraph.</b></p>                                                                                                                                                                                                            |
| Study size                   | 10      | <p>Explain how the study size was arrived at</p> <hr/> <p><b>Methods section, sample size sub-section.</b></p>                                                                                                                                                                                                                                                                                                                        |
| Quantitative variables       | 11      | <p>Explain how quantitative variables were handled in the analyses. If applicable, describe which groupings were chosen and why</p> <hr/> <p><b>Methods section, data collection and data handling sub-section.</b></p>                                                                                                                                                                                                               |
| Statistical methods          | 12      | <p>(a) Describe all statistical methods, including those used to control for confounding</p> <hr/> <p>(b) Describe any methods used to examine subgroups and interactions</p> <hr/> <p>(c) Explain how missing data were addressed</p> <hr/> <p>(d) If applicable, explain how loss to follow-up was addressed</p> <hr/> <p>(e) Describe any sensitivity analyses</p> <hr/> <p><b>Methods section, data analysis sub-section.</b></p> |

|                          |     |                                                                                                                                                                                                                                                                                                                                                                                                                                                                |
|--------------------------|-----|----------------------------------------------------------------------------------------------------------------------------------------------------------------------------------------------------------------------------------------------------------------------------------------------------------------------------------------------------------------------------------------------------------------------------------------------------------------|
| <b>Results</b>           |     |                                                                                                                                                                                                                                                                                                                                                                                                                                                                |
| Participants             | 13* | <p>(a) Report numbers of individuals at each stage of study—eg numbers potentially eligible, examined for eligibility, confirmed eligible, included in the study, completing follow-up, and analysed</p> <p>(b) Give reasons for non-participation at each stage</p> <p>(c) Consider use of a flow diagram</p> <p><b>Results section, participant flow sub-section.</b></p>                                                                                    |
| Descriptive data         | 14* | <p>(a) Give characteristics of study participants (eg demographic, clinical, social) and information on exposures and potential confounders</p> <p>(b) Indicate number of participants with missing data for each variable of interest</p> <p>(c) Summarise follow-up time (e.g., average and total amount)</p> <p><b>Tables 1 &amp; 2</b></p>                                                                                                                 |
| Outcome data             | 15* | <p>Report numbers of outcome events or summary measures over time</p> <p><b>Tables 2 &amp; S6 Table</b></p>                                                                                                                                                                                                                                                                                                                                                    |
| Main results             | 16  | <p>(a) Give unadjusted estimates and, if applicable, confounder-adjusted estimates and their precision (e.g., 95% confidence interval). Make clear which confounders were adjusted for and why they were included</p> <p>(b) Report category boundaries when continuous variables were categorized</p> <p>(c) If relevant, consider translating estimates of relative risk into absolute risk for a meaningful time period</p> <p><b>Tables 2, 3 and 4</b></p> |
| Other analyses           | 17  | <p>Report other analyses done—eg analyses of subgroups and interactions, and sensitivity analyses</p> <p><b>Results section, household cohort – difference-in-differences, household cohort coping strategies, and household cohort household expenditure sub-sections.</b></p>                                                                                                                                                                                |
| <b>Discussion</b>        |     |                                                                                                                                                                                                                                                                                                                                                                                                                                                                |
| Key results              | 18  | <p>Summarise key results with reference to study objectives</p> <p><b>Discussion section, summary of results sub-section, 1<sup>st</sup> paragraph.</b></p>                                                                                                                                                                                                                                                                                                    |
| Limitations              | 19  | <p>Discuss limitations of the study, taking into account sources of potential bias or imprecision. Discuss both direction and magnitude of any potential bias</p> <p><b>Discussion section, strengths &amp; limitations sub-section.</b></p>                                                                                                                                                                                                                   |
| Interpretation           | 20  | <p>Give a cautious overall interpretation of results considering objectives, limitations, multiplicity of analyses, results from similar studies, and other relevant evidence</p> <p><b>Discussion section, food security improvements, and the CBI did not appear to reduce the risk of acute malnutrition sub-sections.</b></p>                                                                                                                              |
| Generalisability         | 21  | <p>Discuss the generalisability (external validity) of the study results</p> <p><b>Discussion section, food security improvements, and the CBI did not appear to reduce the risk of acute malnutrition sub-sections.</b></p>                                                                                                                                                                                                                                   |
| <b>Other information</b> |     |                                                                                                                                                                                                                                                                                                                                                                                                                                                                |
| Funding                  | 22  | <p>Give the source of funding and the role of the funders for the present study and, if applicable, for the original study on which the present article is based</p> <p><b>See ‘Financial Disclosure’ section.</b></p>                                                                                                                                                                                                                                         |

\*Give information separately for exposed and unexposed groups.
