# Supplementary material
Source: publisher figshare collection journal article supplement (https://plos.figshare.com/articles/dataset/_/7265918)
Supplement: Supplementary file [file 1]

**S5 Table.** Linear and ordered logistic regression on endline Child Dietary Diversity Score.

| Variable                                 | Linear regression    |            |                      |             | Ordered logistic regression <sup>1</sup> |            |                      |             |
|------------------------------------------|----------------------|------------|----------------------|-------------|------------------------------------------|------------|----------------------|-------------|
|                                          | Unadjusted           |            | Adjusted             |             | Unadjusted                               |            | Adjusted             |             |
|                                          | $\beta$ -coefficient | 95% CI     | $\beta$ -coefficient | 95% CI      | $\beta$ -coefficient                     | 95% CI     | $\beta$ -coefficient | 95% CI      |
| Time (endline)                           | 0.49**               | 0.25; 0.72 | 0.49**               | 0.25; 0.73  | 0.77**                                   | 0.39; 1.15 | 0.78**               | 0.37; 1.18  |
| Arm (intervention)                       | 0.58**               | 0.26; 0.90 | 0.38*                | 0.00; 0.75  | 0.92**                                   | 0.40; 1.43 | 0.58                 | -0.01; 1.17 |
| Difference-in-differences (time x arm)   | 0.62*                | 0.09; 1.16 | 0.62*                | 0.08; 1.15  | 1.06*                                    | 0.14; 1.98 | 1.11*                | 0.15; 2.07  |
| Baseline age dependency ratio            |                      |            | -0.03                | -0.11; 0.06 |                                          |            | -0.04                | -0.17; 0.09 |
| Baseline reduced coping strategies index |                      |            | 0.00                 | -0.01; 0.01 |                                          |            | 0.00                 | -0.02; 0.03 |
| Baseline household income in US \$       |                      |            | 0.01**               | 0.00; 0.01  |                                          |            | 0.01**               | 0.01; 0.02  |
| Child's age in months                    |                      |            | 0.00                 | -0.01; 0.01 |                                          |            | 0.00                 | -0.01; 0.01 |

<sup>1</sup>Coefficients are interpreted as the log odds of having a one-unit higher Child Dietary Diversity Score.

\* $p < 0.05$ ; \*\* $p < 0.01$
