# Supplementary material
Source: publisher figshare collection journal article supplement (https://plos.figshare.com/articles/dataset/_/7265918)
Supplement: Supplementary file [file 1]

**S6 Table.** Sample characteristics and MUAC at each surveillance time point.

| Time point        | Control  |              |         |             |                  | Intervention |              |         |             |                  |
|-------------------|----------|--------------|---------|-------------|------------------|--------------|--------------|---------|-------------|------------------|
|                   | Sample   | Age (months) | Female  | MUAC (cm)   | MUAC <12.5 cm    | Sample       | Age (months) | Female  | MUAC (cm)   | MUAC <12.5 cm    |
|                   | <i>n</i> | Mean ± S.D.  | Percent | Mean ± S.D. | Percent (95% CI) | <i>n</i>     | Mean ± S.D.  | Percent | Mean ± S.D. | Percent (95% CI) |
| June <sup>1</sup> | 1,135    | 35.5 (13.7)  | 51.5    | 14.6 (1.14) | -                | 697          | 37.0 (14.1)  | 48.5    | 14.5 (1.07) | -                |
| July              | 1,126    | 36.3 (13.9)  | 52.4    | 14.7 (1.19) | 1.9 (1.16, 2.84) | 698          | 38.0 (14.1)  | 47.6    | 14.7 (1.10) | 2.2 (1.21,3.52)  |
| August            | 1,171    | 37.4 (13.9)  | 52.6    | 14.8 (1.17) | 1.7 (1.05, 2.63) | 696          | 38.5 (14.1)  | 47.4    | 14.7 (1.11) | 1.3 (0.59, 2.44) |
| September         | 1,132    | 38.6 (13.9)  | 52.1    | 14.8 (1.15) | 1.7 (1.01, 2.61) | 672          | 39.7 (14.1)  | 47.9    | 14.7 (1.11) | 1.6 (0.82, 2.91) |
| October           | 1,112    | 38.8 (14.1)  | 52.5    | 14.9 (1.19) | 1.9 (1.17, 2.87) | 656          | 40.9 (14.0)  | 47.5    | 14.8 (1.07) | 1.7 (0.84, 2.98) |

MUAC: Mid-Upper Arm Circumference

<sup>1</sup> There were no significant differences in mean age or mean MUAC between the study arms at baseline.
