# Supplementary material
Source: publisher figshare collection journal article supplement (https://plos.figshare.com/articles/dataset/_/7265918)
Supplement: Supplementary file [file 1]

**S3 Table.** Baseline 30-day expenditure of the household cohort (in US dollars).

| Item                              | Control |             | Intervention |             | Intervention minus Control |              |
|-----------------------------------|---------|-------------|--------------|-------------|----------------------------|--------------|
|                                   | Mean    | 95% CI      | Mean         | 95% CI      | Difference                 | 95% CI       |
| <i>Food</i>                       |         |             |              |             |                            |              |
| Cereals                           | 16.6    | 12.4; 20.8  | 22.4         | 11.3; 33.5  | 5.81                       | -6.06; 17.7  |
| Roots & Tubers                    | 1.74    | 0.81; 2.68  | 2.89         | 1.52; 4.27  | 1.15                       | -0.51; 2.81  |
| Pulses, Beans & Nuts              | 2.97    | 2.12; 3.82  | 3.76         | 2.10; 5.41  | 0.78                       | -1.08; 2.64  |
| Vegetables                        | 3.85    | 2.95; 4.76  | 5.17         | 3.06; 7.28  | 1.32                       | -0.98; 3.61  |
| Fruits                            | 2.51    | 1.92; 3.11  | 3.65         | 2.51; 4.78  | 1.14                       | -0.15; 2.42  |
| Meat, Fish & Eggs                 | 4.03    | 3.31; 4.74  | 8.40         | 6.99; 9.80  | 4.37**                     | 2.79; 5.95   |
| Dairy Products                    | 5.16    | 3.77; 6.49  | 6.84         | 6.00; 7.67  | 1.71*                      | 0.12; 3.30   |
| Fats & Oils                       | 4.42    | 3.55; 5.29  | 6.38         | 5.77; 6.99  | 1.96**                     | 0.90; 3.02   |
| Sugary Products                   | 5.83    | 4.63; 7.02  | 7.55         | 6.40; 8.70  | 1.72*                      | 0.06; 3.38   |
| Condiments                        | 1.94    | 1.48; 2.40  | 1.76         | 1.26; 2.26  | -0.18                      | -0.86; 0.50  |
| <i>Total food expenditure</i>     | 49.0    | 38.1; 59.9  | 68.8         | 51.7; 85.9  | 19.8                       | -0.51; 40.0  |
| <i>Non-food</i>                   |         |             |              |             |                            |              |
| Firewood/cooking fuel             | 6.21    | 4.86; 7.56  | 6.17         | 4.93; 7.41  | -0.04                      | -1.88; 1.79  |
| Cigarettes, tobacco, khat         | 0.46    | -0.05; 0.97 | 1.02         | -0.55; 2.59 | 0.56                       | -1.06; 2.21  |
| Drinking water                    | 5.17    | 4.02; 6.33  | 6.26         | 5.28; 7.24  | 1.09                       | -0.43; 2.61  |
| Education                         | 2.67    | 1.65; 3.68  | 1.54         | 0.48; 2.60  | -1.12                      | -2.59; 0.34  |
| Health                            | 2.84    | 2.33; 3.35  | 2.11         | 0.95; 3.27  | -0.72                      | -1.99; 0.54  |
| Clothing                          | 2.07    | 0.61; 3.53  | 1.28         | 0.47; 2.08  | -0.80                      | -2.46; 0.87  |
| Transport                         | 4.30    | 3.61; 5.00  | 2.63         | 1.43; 3.83  | -1.67*                     | -3.06; -0.28 |
| Debt repayment                    | 0.88    | 0.41; 1.36  | 1.12         | 0.59; 1.64  | 0.23                       | -0.48; 0.94  |
| Sending remittances               | 0.11    | -0.10; 0.32 | 0.24         | -0.21; 0.69 | 0.13                       | -0.36; 0.63  |
| House or buildings                | 1.72    | -0.10; 3.54 | 0.80         | 0.26; 1.34  | -0.92                      | -2.82; 0.98  |
| Shop or trading facilities        | 0.10    | -0.10; 0.29 | 0.00         | 0.00; 0.03  | -0.10                      | -0.29; 0.10  |
| Purchasing land                   | 0.00    | 0.00; 0.03  | 0.00         | 0.00; 0.03  | 0.00                       | -0.03; 0.03  |
| Farming items                     | 0.00    | 0.00; 0.03  | 0.01         | -0.1; 0.02  | 0.01                       | -0.01; 0.02  |
| Livestock                         | 0.00    | 0.00; 0.03  | 0.00         | 0.00; 0.03  | 0.00                       | -0.03; 0.03  |
| Celebrations                      | 0.14    | 0.02; 0.26  | 0.14         | -0.02; 0.29 | -0.01                      | -0.20; 0.19  |
| <i>Total non-food expenditure</i> | 26.9    | 20.8; 32.4  | 23.1         | 16.5; 29.7  | -3.46                      | -12.2; 5.32  |

<sup>1</sup> Control  $n = 117$ , intervention  $n = 111$ .\* $p < 0.05$ ; \*\* $p < 0.01$
