# Supplementary material
Source: publisher figshare collection journal article supplement (https://plos.figshare.com/articles/dataset/_/7265918)
Supplement: Supplementary file [file 1]

**S2 Table.** Baseline coping strategies of the household cohort.

| Coping Strategy                                                     | Control <sup>1</sup> |            | Intervention <sup>1</sup> |            | Intervention minus Control |              |
|---------------------------------------------------------------------|----------------------|------------|---------------------------|------------|----------------------------|--------------|
|                                                                     | Mean                 | 95% CI     | Mean                      | 95% CI     | Difference                 | 95% CI       |
| <i>Number of days using strategy/7 days</i>                         |                      |            |                           |            |                            |              |
| Relied on less preferred and less expensive foods                   | 5.98                 | 5.38; 6.59 | 3.83                      | 3.55; 4.11 | -2.15**                    | -2.82; -1.49 |
| Borrowed food or relied on help from friends/family                 | 3.33                 | 2.77; 3.89 | 3.00                      | 2.52; 3.48 | -0.33                      | -1.07; 0.40  |
| Reduced number of meals eaten in a day                              | 3.17                 | 2.74; 3.60 | 3.16                      | 2.76; 3.56 | -0.01                      | -0.60; 0.58  |
| Limited portion size at mealtimes                                   | 3.52                 | 3.18; 3.86 | 3.21                      | 2.79; 3.62 | -0.31                      | -0.85; 0.22  |
| Restricted consumption by adults in order for small children to eat | 2.39                 | 1.78; 3.00 | 2.51                      | 1.99; 3.04 | 0.12                       | -0.69; 0.93  |
| <i>Percent of household using strategy/7 days</i>                   |                      |            |                           |            |                            |              |
| Relied on less preferred and less expensive foods                   | 100                  | 96.8; 100  | 100                       | 96.7; 100  | 0.00                       | -3.18; 3.35  |
| Borrowed food or relied on help from friends/family                 | 91.5                 | 80.5; 96.5 | 87.4                      | 76.0; 93.8 | -4.07                      | -15.4; 7.31  |
| Reduced number of meals eaten in a day                              | 96.6                 | 89.8; 98.9 | 98.2                      | 87.2; 99.8 | 1.62                       | -3.70; 6.94  |
| Limited portion size at mealtimes                                   | 97.4                 | 93.0; 99.1 | 99.1                      | 93.4; 99.9 | 1.66                       | -1.55; 4.87  |
| Restricted consumption by adults in order for small children to eat | 81.2                 | 63.0; 91.7 | 93.7                      | 85.5; 97.4 | 12.5                       | -2.75; 27.7  |

<sup>1</sup> Control  $n = 117$ , intervention  $n = 111$ .\* $p < 0.05$ ; \*\* $p < 0.01$
