# Supplementary material
Source: publisher figshare collection journal article supplement (https://plos.figshare.com/articles/dataset/_/7265918)
Supplement: Supplementary file [file 1]

**S4 Table.** Baseline differences in indicators associated with the assessment of vulnerability and targeting of the intervention.

| Vulnerability Criteria                                                     | Related study indicators                               | Data source      |              | Significantly different at baseline | Notes                                                                    |
|----------------------------------------------------------------------------|--------------------------------------------------------|------------------|--------------|-------------------------------------|--------------------------------------------------------------------------|
|                                                                            |                                                        | Household cohort | Child cohort |                                     |                                                                          |
| Households headed by elderly, children, women, or people with disabilities | Female household head (Table 1)                        | Yes              | No           | No                                  | Intervention clusters were more female headed (10% greater)              |
| Orphans in the household                                                   | No data collected in the study                         | --               | --           | --                                  | --                                                                       |
| All household members had no income sources                                | Household income last 30 days (Table 1)                | Yes              | No           | <b>Yes</b>                          | Intervention clusters had greater income (US \$26 more income)           |
|                                                                            | Household expenditure last 30 days (Table 1)           | Yes              | No           | No                                  | Intervention clusters had greater expenditure (US \$16 more expenditure) |
| Households had children recently recovered from SAM                        | Child mean WHZ (Table 1)                               | Yes              | No           | No                                  | --                                                                       |
|                                                                            | Child mean MUAC (Table 1 and S5 Table)                 | Yes              | Yes          | No                                  | --                                                                       |
|                                                                            | Prevalence of acute malnutrition by low WHZ (Table 1)  | Yes              | No           | No                                  | --                                                                       |
|                                                                            | Prevalence of acute malnutrition by low MUAC (Table 1) | Yes              | No           | No                                  | --                                                                       |
| Households had high dependency ratios                                      | Household total dependency ratio (Table 1)             | Yes              | No           | <b>Yes</b>                          | Intervention clusters had lower dependency ratios                        |
|                                                                            | Household child dependency ratio (Table 1)             | Yes              | No           | <b>Yes</b>                          | Intervention clusters had lower dependency ratios                        |
|                                                                            | Household aged dependency ratio (Table 1)              | Yes              | No           | No                                  | --                                                                       |
| The presence of pregnant and/or lactating women                            | Women reported being pregnant (Table 1)                | Yes              | No           | No                                  | --                                                                       |
| Recent eviction                                                            | No data collected in the study                         | --               | --           | --                                  | All intervention clusters were recently evicted                          |
